# Supplementary material for: Precisely controlling endogenous protein dosage in hPSCs and derivatives to model FOXG1 syndrome
Source: PubMed Central journal article supplement (PMC6389984; doi:10.1038/s41467-019-08841-7), 2019-02-25
Supplement: 41467_2019_8841_MOESM1_ESM.pdf [file 41467_2019_8841_MOESM1_ESM.pdf]

**Supplementary Information**

**Precisely controlling endogenous protein dosage in  
hPSCs and derivatives to model FOXP1 syndrome**

**Zhu et al.**

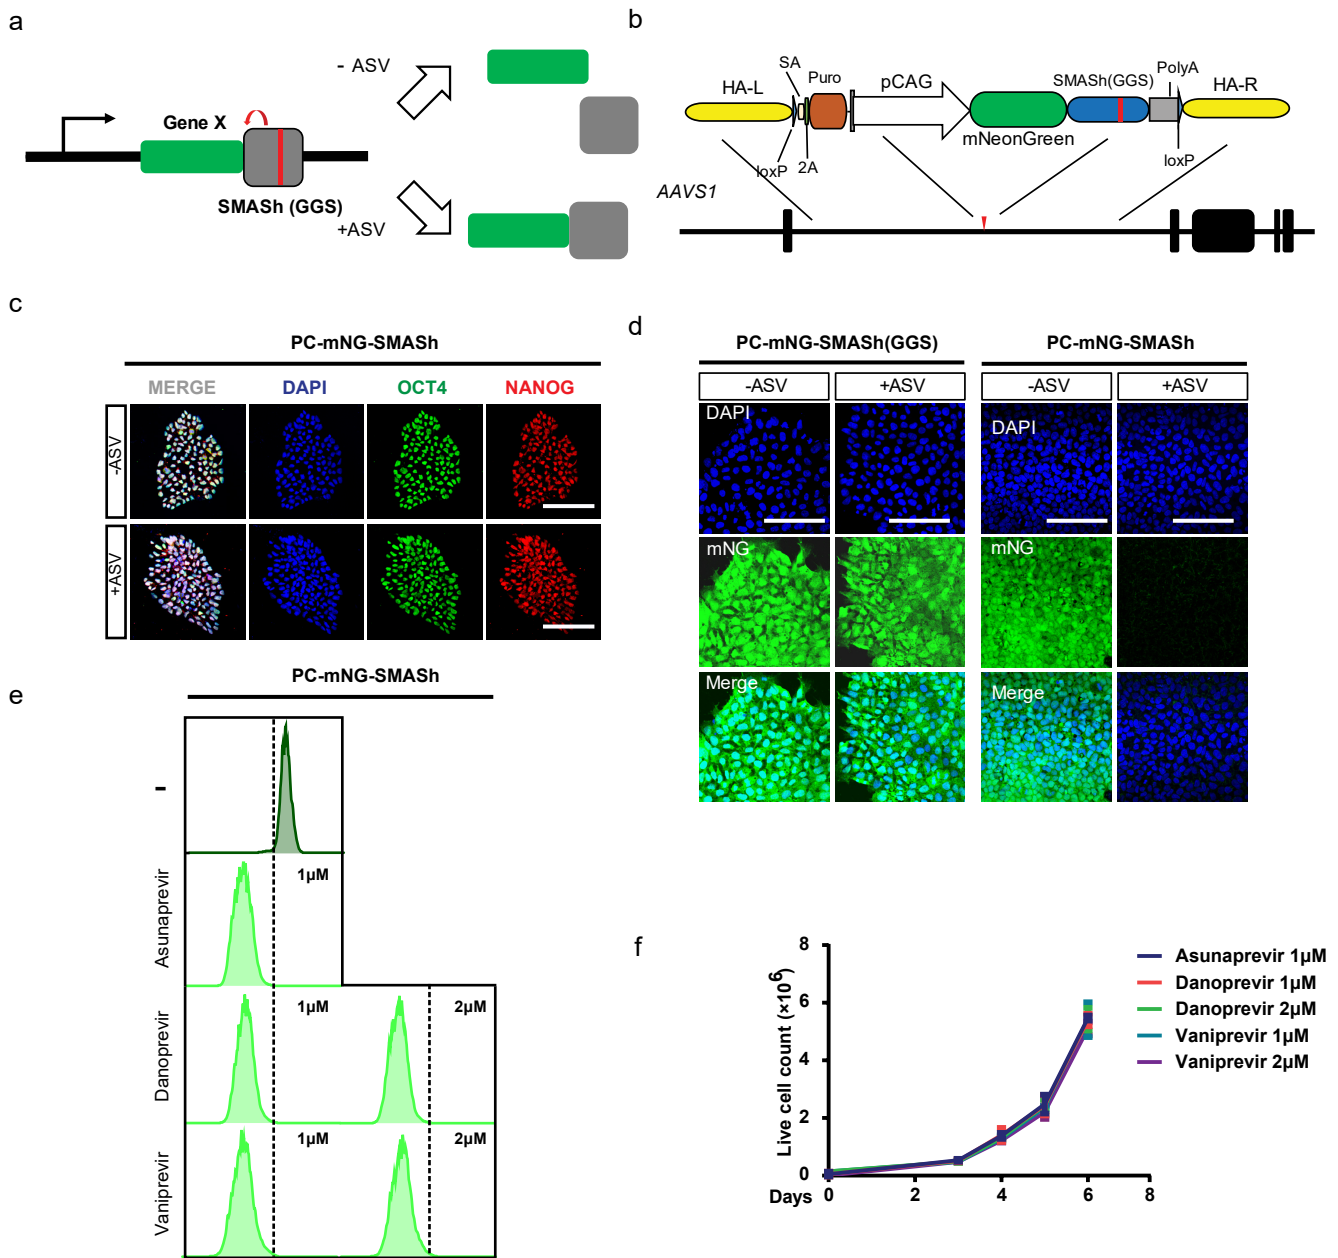

**Supplementary Figure 1 . Generation and Characterization of AAVS1 -PC-mNG-SMASH hESC line and AAVS1-PC-mNG (GGG)-SMASH hESC line.** (a) Schematic view of mNG fused mutated SMASH domain fails to induced protein degradation. (b) Schematic overview of the strategy for CRISPR/Cas9 -mediated targeting to the AAVS1 locus to generate AAVS1-PC-mNeonGreen-SMASH (GGG) hESC line. (c) Immunofluorescence images of PC-mNG-SMASH hESCs before and after ASV treatment for pluripotent markers: OCT4 (green), NANOG (red). ASV treatment does not compromise pluripotent state of hESCs. Scale bar, 100  $\mu$ m. (d) Immunofluorescence images and comparison of AAVS1-PC-mNG-SMASH and AAVS1-PC-mNG-SMASH (GGG) before and after 4 days ASV (1 $\mu$ M) treatment. ASV successfully induced mNG degradation in AAVS1 -PC-mNG-SMASH hESCs rather than AAVS1-PC-mNG-SMASH (GGG) hESCs. Scale bar, 100  $\mu$ m. (e) Flow cytometry analysis of AAVS1-PC-mNG-SMASH hESCs before and after 4 days ASV (1 $\mu$ M) treatment, as well as other NS3 inhibitors like DAV (1  $\mu$ M, 2  $\mu$ M) and VAV (1  $\mu$ M, 2  $\mu$ M). (f) AAVS1-PC-mNG-SMASH hESCs were cultured with different NS3 inhibitors: ASV(1 $\mu$ M) DAV (1 $\mu$ M, 2  $\mu$ M) and VAV(1  $\mu$ M, 2  $\mu$ M) for 6 days. These NS3 inhibitors do not affect the proliferation hESCs. Error bar represents SEM.

a

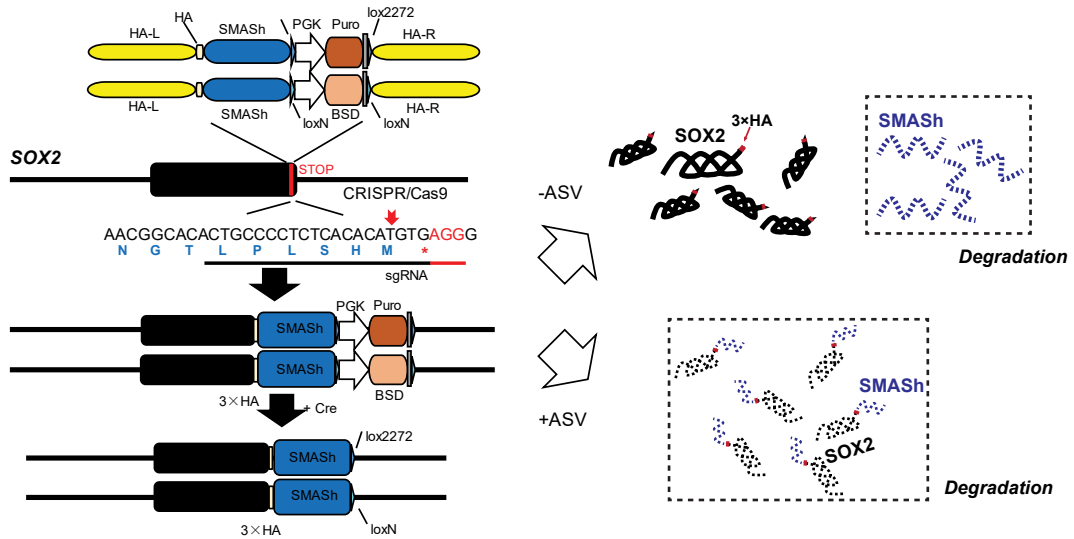

b

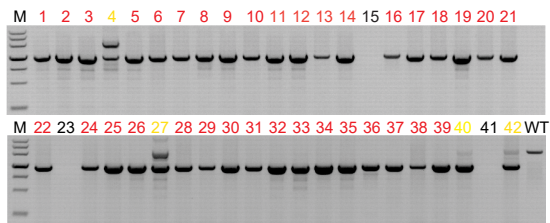

c

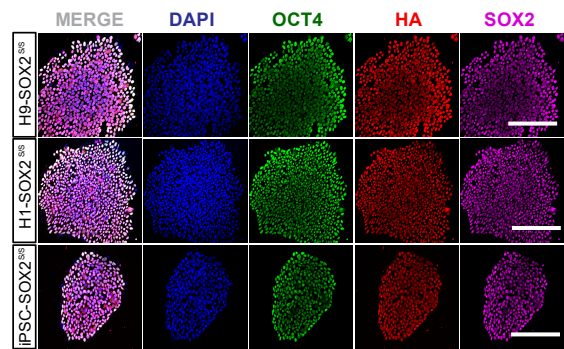

d

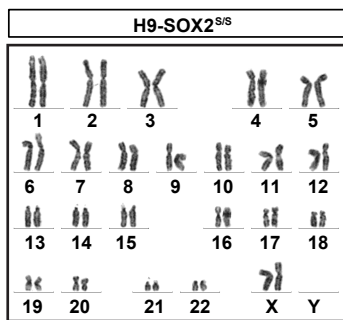

e

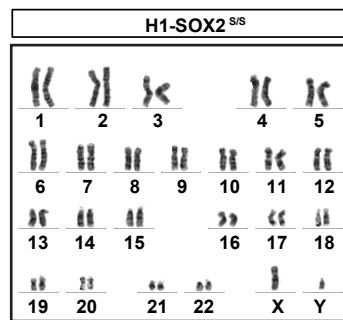

f

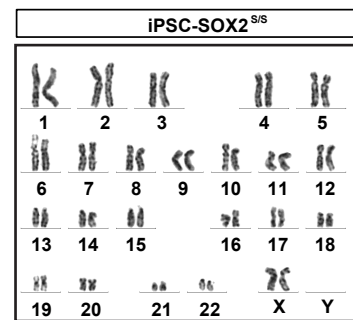

g

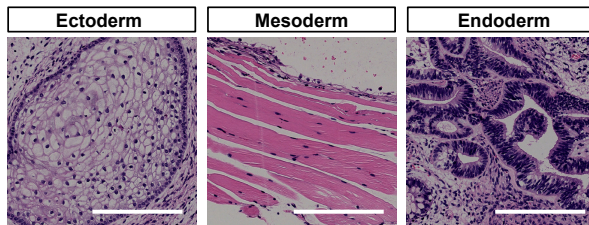



**Supplementary Figure 2 . Generation and Characterization of SOX2<sup>s/s</sup> hPSCs. (a)** Schematic overview of generation of SOX2<sup>s/s</sup> hPSC lines and ASV induced endogenous SOX2 protein degradation. **(b)** PCR genotyping to identify H9SOX2<sup>s/s</sup> hESC colonies. Red character indicates homozygous targeted colonies, yellow character indicate heterozygous colonies. **(c)** Immunostaining images of H1 -SOX2<sup>s/s</sup> hESC line, H9 -SOX2<sup>s/s</sup> hESC line, SOX2<sup>s/s</sup> hiPSC line for OCT4 (green), HA (red), SOX2 (magenta). Results showed coexpression of HA and SOX2. Scale bar, 100 μm. **(d-f)** Karyotyping analysis on H9 -SOX2<sup>s/s</sup> hESCs **(d)**, H1-SOX2<sup>s/s</sup> hESCs **(e)**, SOX2<sup>s/s</sup> hiPSCs **(f)**. **(g)** H&E staining shows ectoderm, mesoderm, endoderm of a teratoma derived from H9 -SOX2<sup>s/s</sup> hESCs *in vivo*. Scale bar, 200 μm.

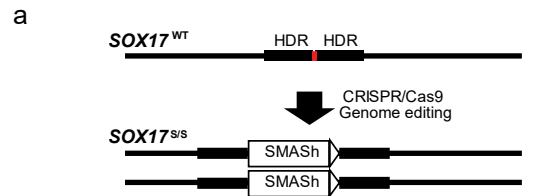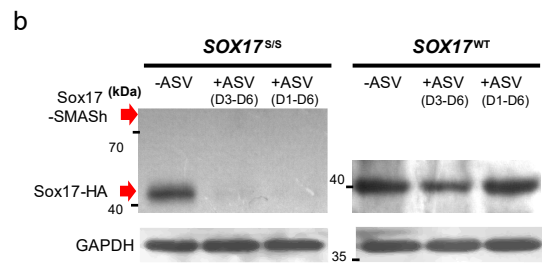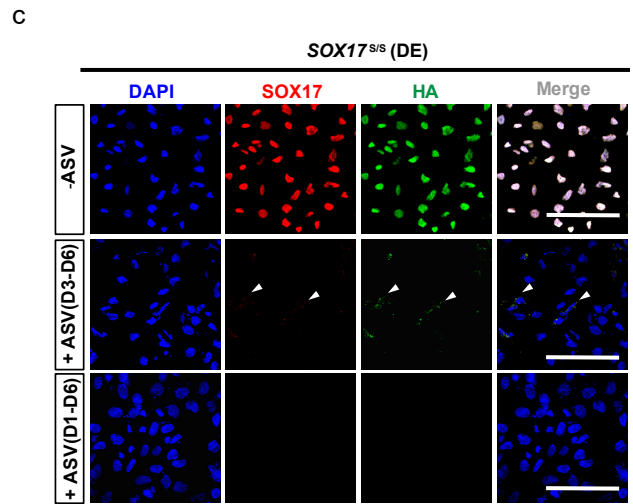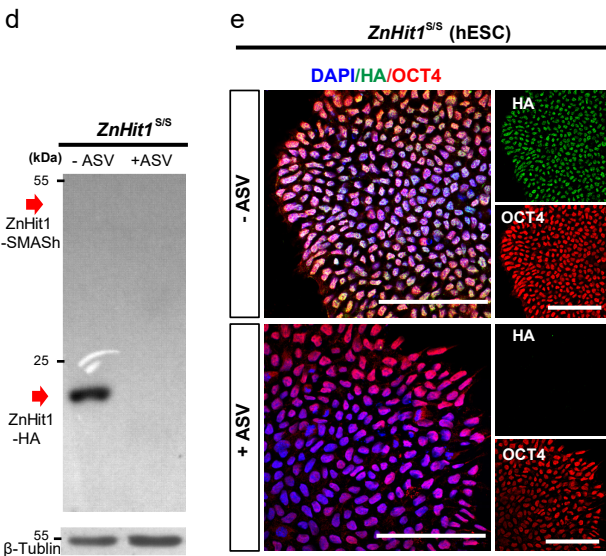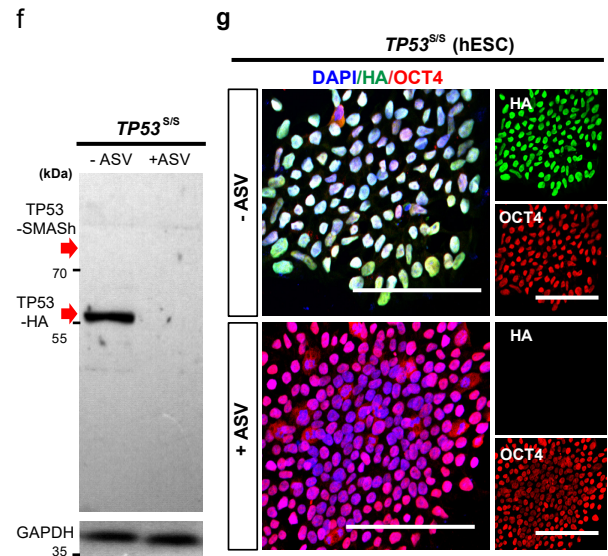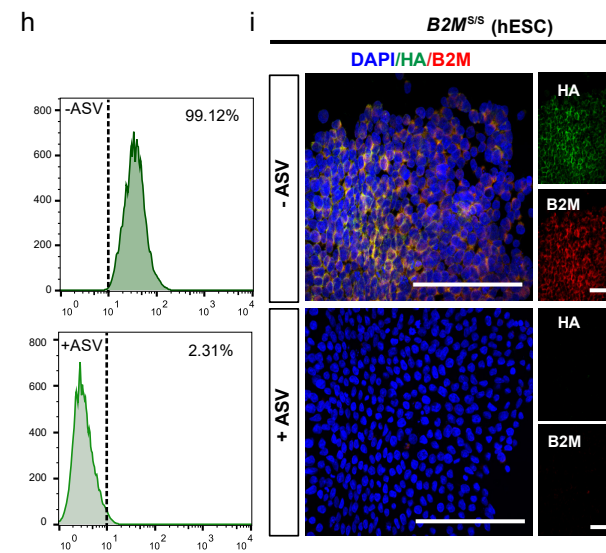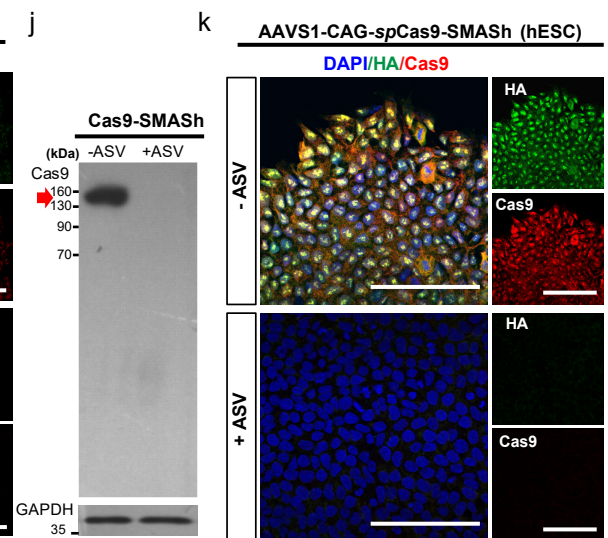

**Supplementary Figure 3 . Target and Degrade a Broad Range of Endogenous Proteins or Transgenes by SMASh in hPSCs.** (a) Schematic overview of generation of *SOX17<sup>+/s</sup>* hPSC lines using CRISPR/Cas9. (b, c) Western blot (b) and Immunostaining images (c) of DE derived from *SOX17<sup>+/s</sup>* hESCs or WT H9 hESCs after ASV (1  $\mu$ M) treatment. SOX17 protein production was knocked out in *SOX17<sup>+/s</sup>* hESCs derived DE. White arrow shows the SOX17 protein aggregates. Scale bar, 100  $\mu$ m. (d, f, j) Western blot of *Znhit1<sup>+/s</sup>* hESCs (d), *TP53<sup>+/s</sup>* hESCs (f), AAVS1-PC-Cas9 (j) before and after ASV treatment. (e, j, i, k) Immunostaining images of *Znhit1<sup>+/s</sup>* hESCs (e), *TP53<sup>+/s</sup>* hESCs (j), *B2M<sup>+/s</sup>* hESCs (i), AAVS1-PC-Cas9 (k) before and after ASV treatment. Scale bar, 100  $\mu$ m. (h) Flow cytometry analysis of *Znhit1<sup>+/s</sup>* hESCs to detect ZnHit1 expression before and after ASV treatment.

**a****SOX17<sup>S/S</sup>**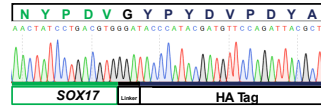**b**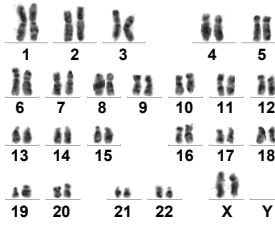**g****TP53<sup>S/S</sup>**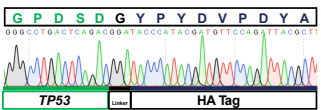**h**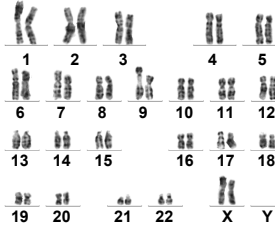**c**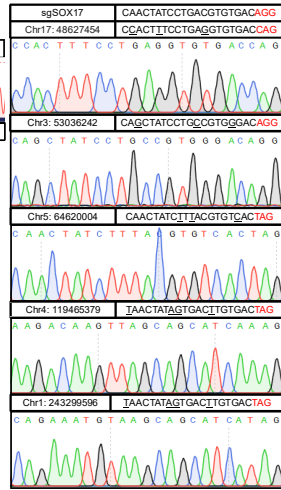**d****ZnHit1<sup>S/S</sup>**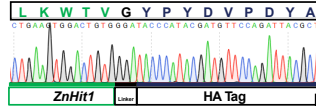**e**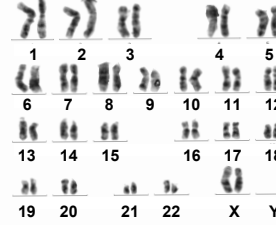**f**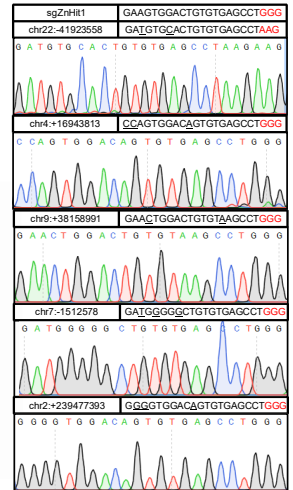**i**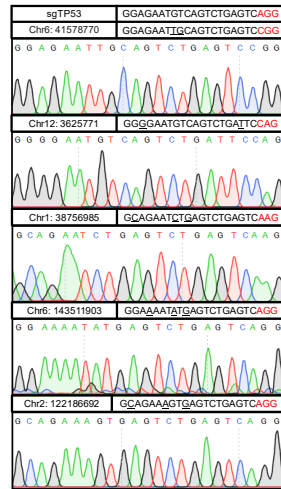**j****B2M<sup>S/S</sup>**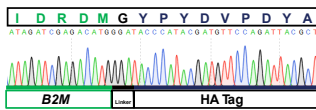**k**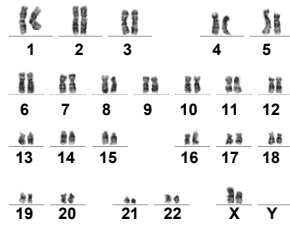**l**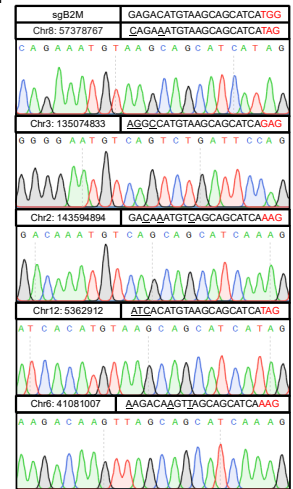

**Supplementary Figure 4. Characterization and Off Target Analysis of Various SMASh Tagged hESC Lines.** (a, d, g, j) Representative Sanger sequencing graph of *SOX17<sup>s/s</sup>* (a), *ZnHit1<sup>s/s</sup>* (d), *TP53<sup>s/s</sup>* (g), *B2M<sup>s/s</sup>* (j) hPSC colony showed integration of HA-SMASh fragment. (b, e, h, k) Karyotyping analysis on *SOX17<sup>s/s</sup>* hESCs (b), *ZNHIT1<sup>s/s</sup>* hESCs (e), *TP53<sup>s/s</sup>* hESCs (h) and *TP53<sup>s/s</sup>* hESCs (k). (c, f, i, l) Representative Sanger sequencing graph of top 5 potential off-target sites of *SOX17<sup>s/s</sup>* (c), *ZnHit1<sup>s/s</sup>* (f), *TP53<sup>s/s</sup>* (i), *B2M<sup>s/s</sup>* (l) hPSC colony showed no off-target mutations. (m) Table shows targeted genetic locus and targeted efficiency for each locus using SMASh.

a

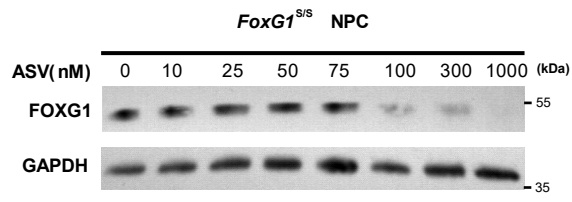

b

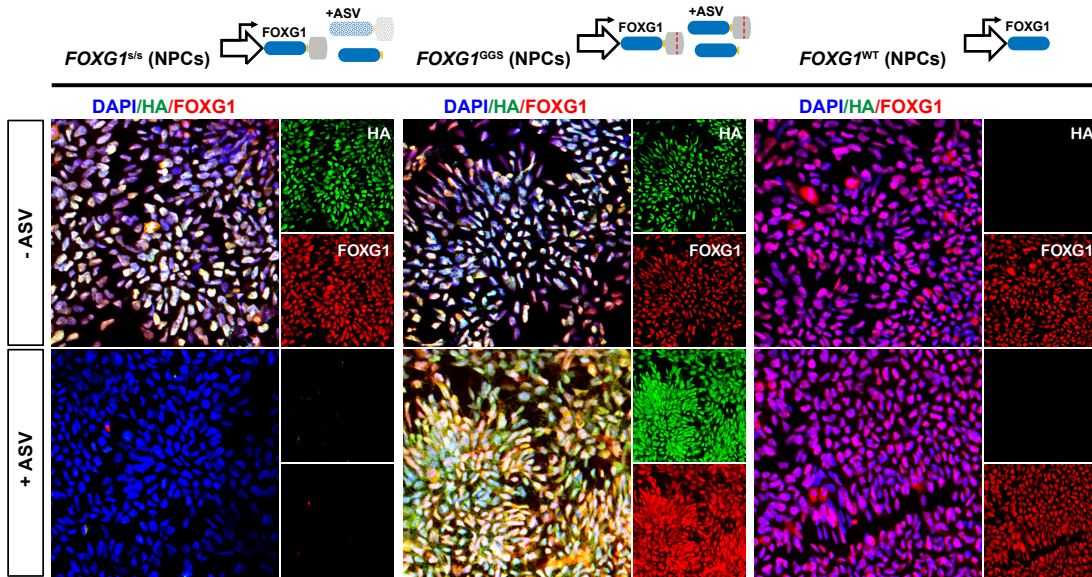

**Supplementary Figure 5. S MASH fine-tunes the dosage of FOXG1 protein.** (a) Western blot of *FOXG1<sup>s/s</sup>* hESCs under treatment of different concentration of ASV (0 nM, 10 nM, 25 nM, 50 nM, 75 nM, 100 nM, 300 nM, 1000 nM) to detect FOXG1 protein. (b) Immunofluorescence images of WT hESCs derived NPCs, *FOXG1<sup>s/s</sup>* hESCs derived NPCs and FOXG1-GGS derived NPCs for HA (green), FOXG1 (red). Scale bar, 100  $\mu$ m.



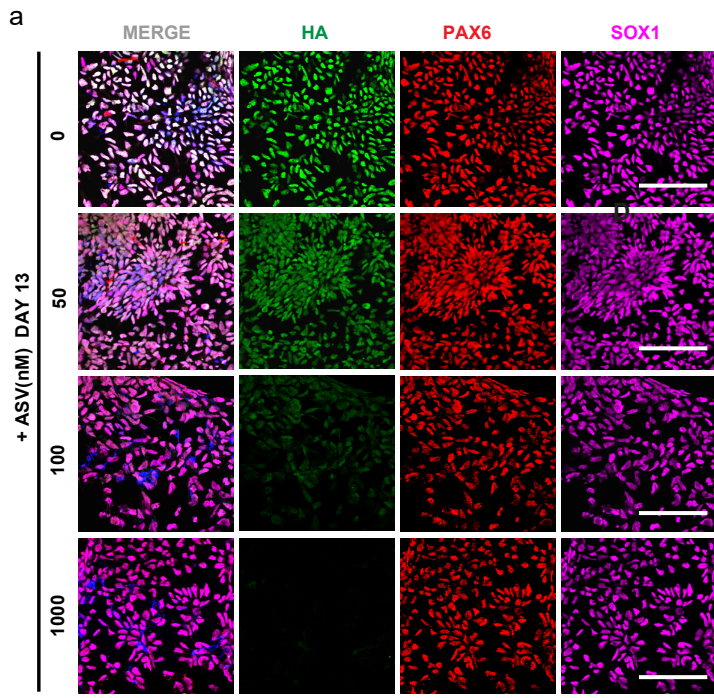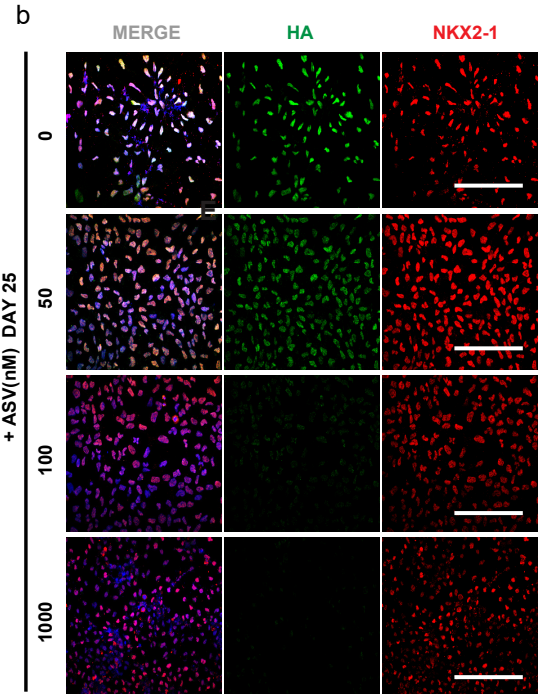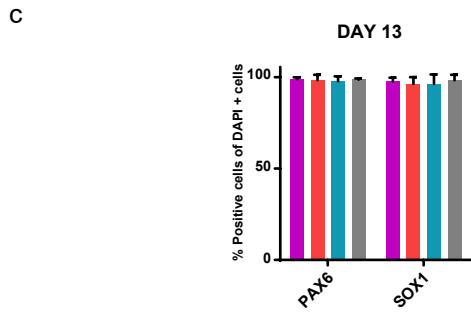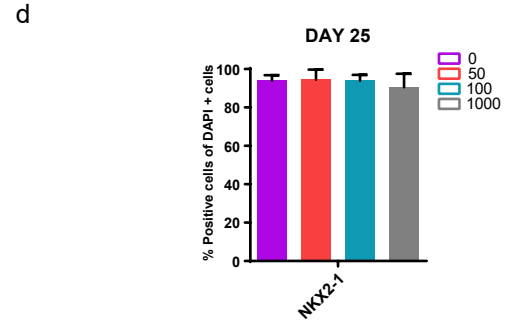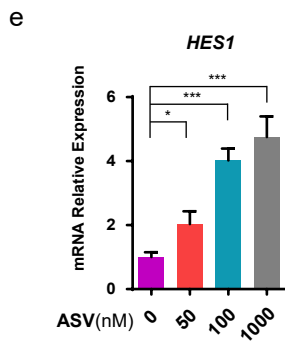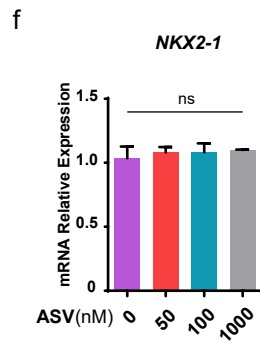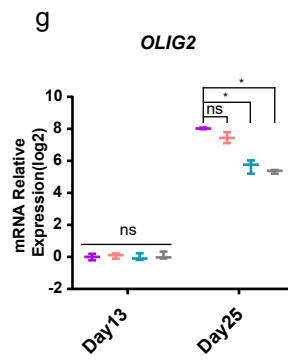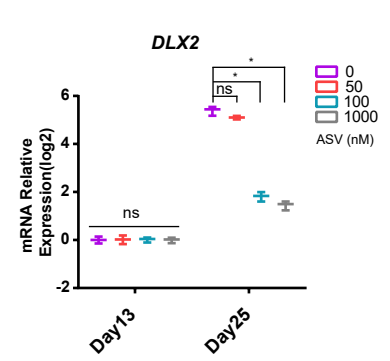



**Supplementary Figure 6. FOXP1 Regulates the Proliferation of Telencephalic Progenitors and Cortical GABA Interneuron Development in a Dose Dependent Manner.** (a, c) Immunofluorescence images (a) and quantification (c) of FOXP1 - expressing telencephalic progenitors (day 13) for HA (green), PAX6 (red), SOX1 (magenta) under the treatment of different concentration of ASV (0 nM, 50 nM, 100 nM, 1000 nM), showed dosage regulation of FOXP1 protein. Scale bar, 100  $\mu$  m. (b, d) Immunofluorescence images (b) and quantification (d) of FOXP1-expressing medial ganglionic eminence (MGE, day 25) progenitors for HA (green), *NKX2-1* (red) under the treatment of different concentration of ASV (0 nM, 50 nM, 100 nM, 1000 nM). Scale bar, 100  $\mu$  m. (e, f) qPCR analysis on day 25 (n=3) under treatment of ASV (0 nM, 50 nM, 100 nM, 1000 nM) for *HES1* (e) and *NKX2-1* (f). (g) qPCR analysis on day 13 and day 25 (n=3) under treatment of ASV (0 nM, 50 nM, 100 nM, 1000 nM) for *OLIG2* and *DLX2*. Error bar represents SEM (\*p < 0.05, \*\*p < 0.01, \*\*\*p < 0.001, \*\*\*\* p < 0.0001).

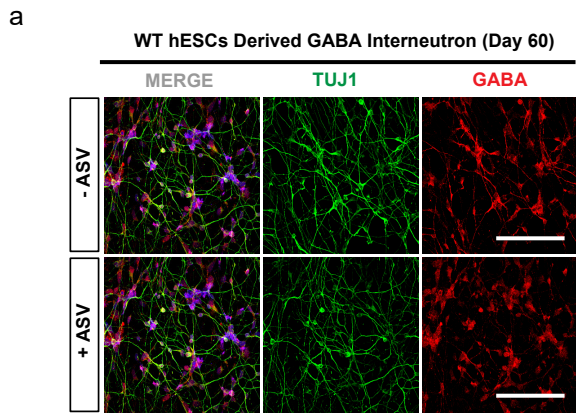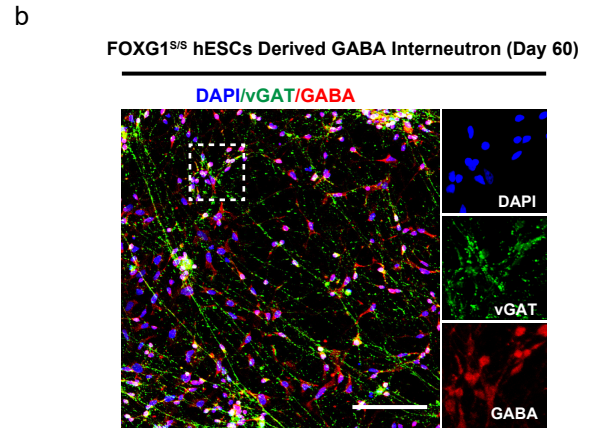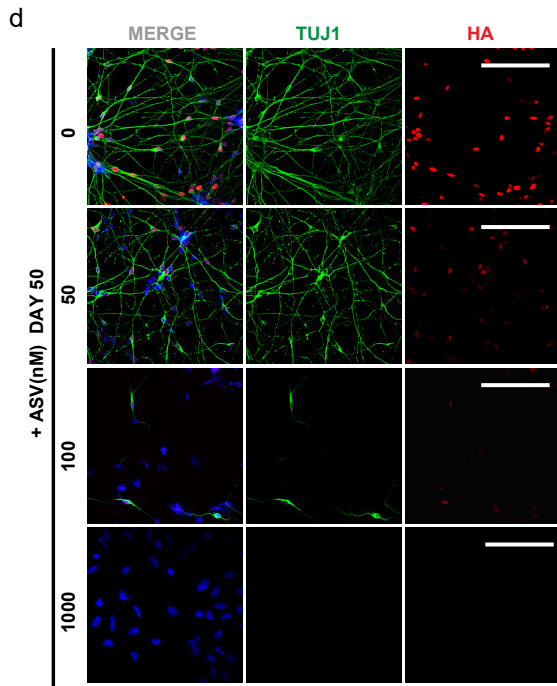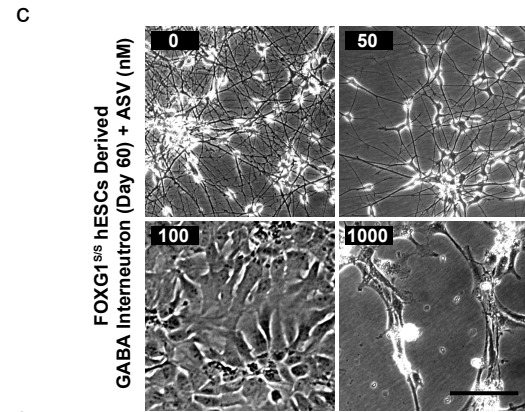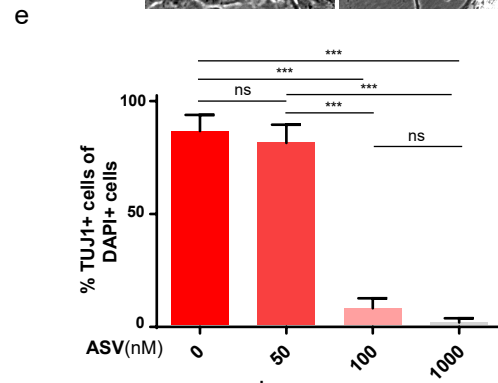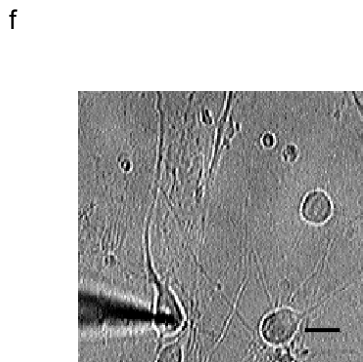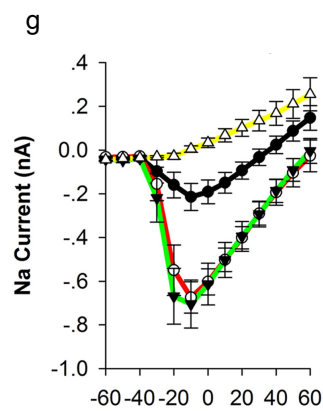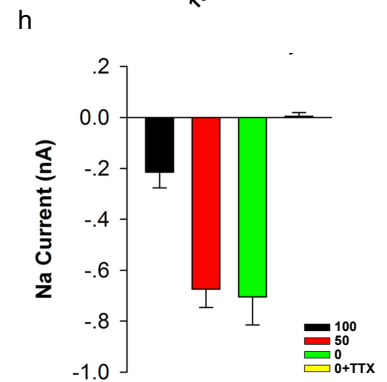

**Supplementary Figure 7 . FOXG1 Insufficiency Block Cortical GABA Interneuron Induction and Maturation.** (a) Immunofluorescence images of WT hESCs derived cortical GABA interneuron (day 60) for TUJ1 (green), GABA (red) with or without ASV treatment ( $\mu\text{M}$ ). ( b) Immunofluorescence images of *FOXG1<sup>S/S</sup>* hESCs derived cortical GABA interneuron (day 60) for vGAT (green), GABA (red), showed colocalized GABA and vGAT expression Scale bar, 100  $\mu\text{m}$ . (c) Representative images of GABA interneurons from each ASV treatment group (0 nM, 50 nM, 100 nM, 1000 nM) on day 60. Scale bar, 100  $\mu\text{m}$ . (d, e) Immunofluorescence images ( d) and quantification ( e) on day 60 for TUJ1 (green), FOXG1-HA (red) under the treatment of different concentration of ASV (0nM, 50nM, 100n 1000nM). Scale bar, 100  $\mu\text{m}$ . (f) A DIC image of *FOXG1<sup>S/S</sup>* hESCs derived neurons on day 60. (g, h) Voltage-current relationships for Na<sup>+</sup> currents on day 60. Error bar represents SEM (\*p < 0.05, \*\*p < 0.01, \*\*\*p < 0.001, \*\*\*\* p < 0.0001).

a

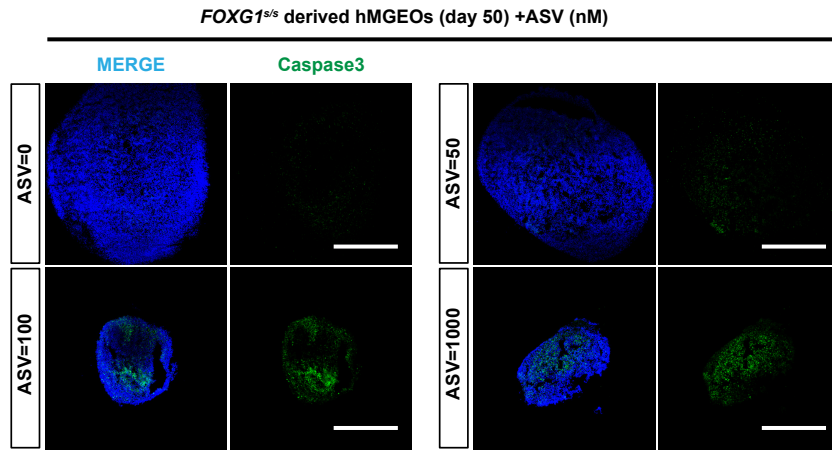

b

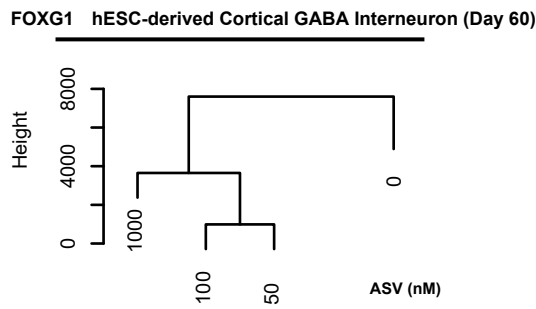

c

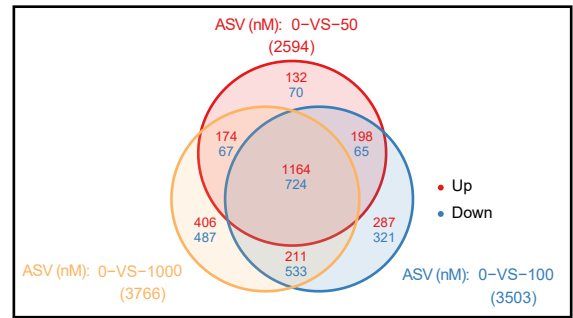

d

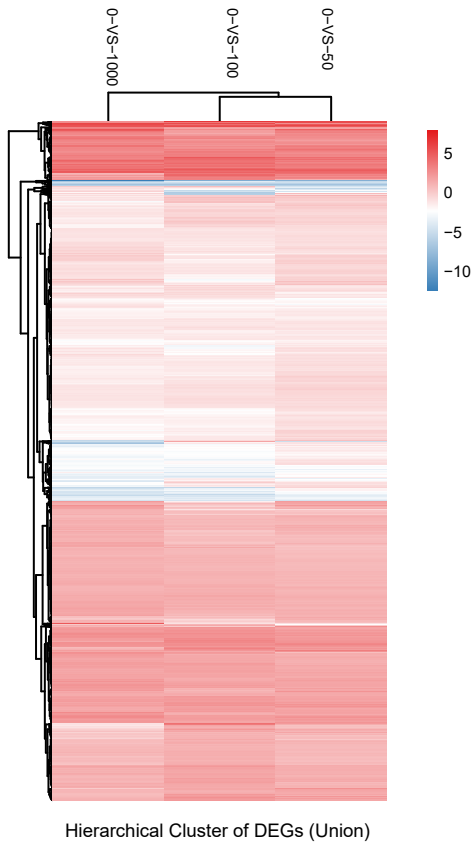

e

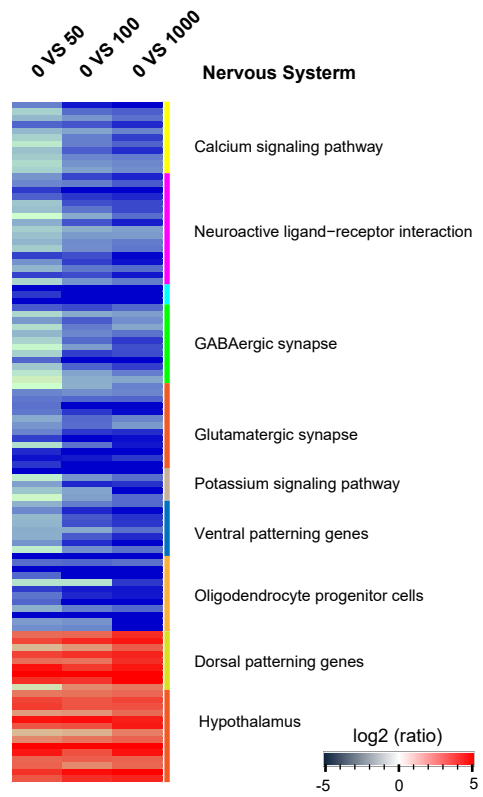

**Supplementary Figure 8. RNA-seq Analysis of Derived Cortical GABA Interneurons.**

(a) Immunostaining against Caspase3 (green) on FOXG1S/S hESCs derived hMGEOs from each ASV treatment group (0 nM, 50 nM, 100 nM, 1000 nM). Scale bar, 500  $\mu$ m. (b) Hierarchical clustering between samples. (c) Venn diagram of DEGs. The red number represents the up-regulated gene amount, blue number represents the down-regulated gene amount. (d) Heatmap of hierarchical clustering of DEGs. Coloring indicates the log<sub>2</sub> transformed fold change. Union indicates the file contents are intersection or union of DEGs among different comparison groups. (e) Expression profile of DEGs related to variety of synapses formation. Coloring indicates the log<sub>2</sub> transformed fold change.

a

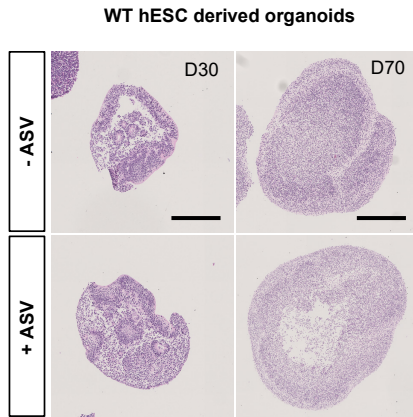

b

WT hESC derived organoids (day 70)

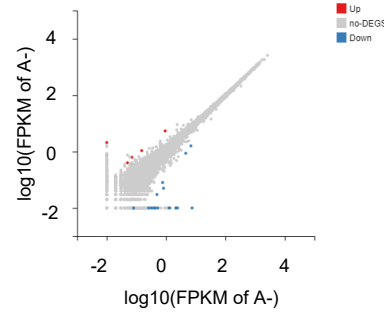

c

WT hESC derived organoids (day 70)

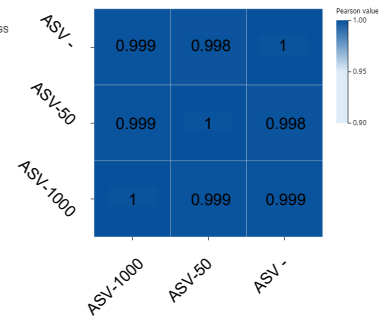

d

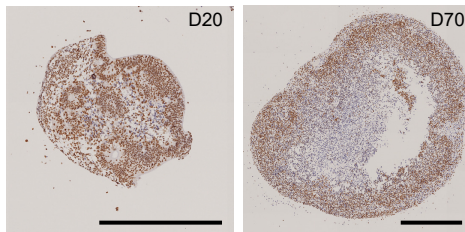

e

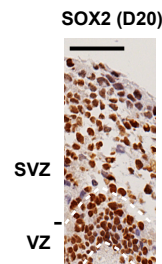

f

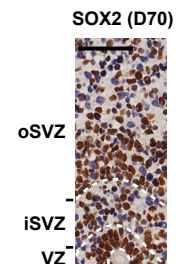

g

*FOXP1*<sup>+/+</sup> derived hCOs (day 30) ASV=0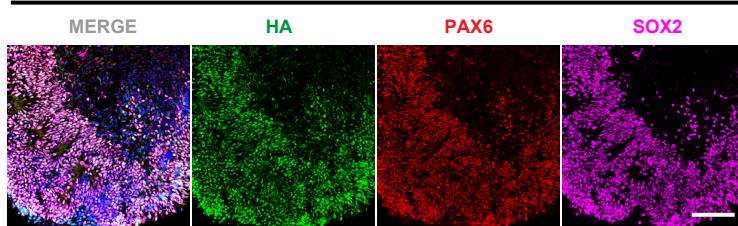

h

*FOXP1*<sup>+/+</sup> derived hCOs (day 42) +ASV (nM)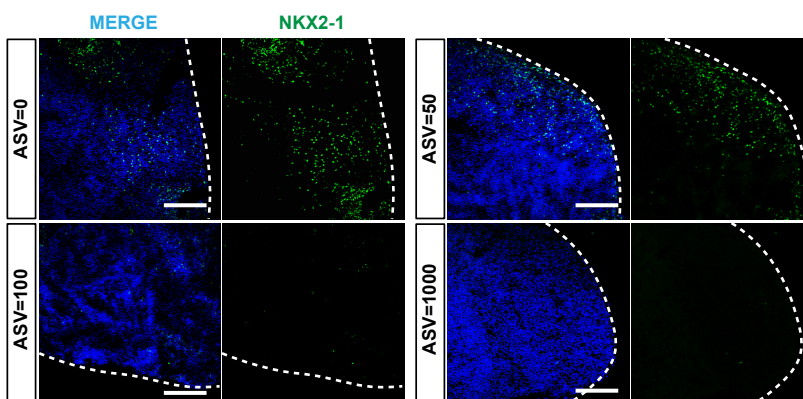

i

*FOXP1*<sup>+/+</sup> derived hCOs (day 42)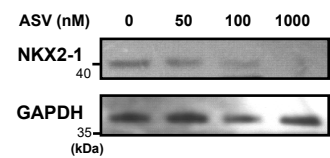

**Supplementary Figure 9. Model FOXP1 syndrome in hPSC -derived cortical organoids using SMASh.** (a) Haematoxylin and eosin (HE) staining images of WT hESC derived cortical organoids on day 20 and day 70 with or without ASV treatment. Scale bar 500  $\mu\text{m}$ . (b) MA plots chart of differentially expressed genes (DEGs) with or without ASV treatment. Red, blue and gray dots represent up-regulated, down-regulated DEGs and non-DEGs. (c) Correlation heatmap showing correlation between group with or without ASV treatment. (d) Immunostaining image for SOX2 of hMGEs on day 20 and on day 70. Scale bar, 500  $\mu\text{m}$ . (e) Immunostaining image for SOX2 of hMGEs on day 20. Dashed lines highlight a gap between VZ and SVZ zone. Scale bar, 100  $\mu\text{m}$ . (f) Immunostaining image for SOX2 of hMGEs on day 70, showing the diminishment of VZ-like area. Dashed lines highlight gaps among VZ, iSVZ and oSVZ zone. Scale bar, 100  $\mu\text{m}$ . (g) Representative Immunostaining images of *FOXP1<sup>S/S</sup>* hESCs derived hCOs on day 30 for PAX6 (red), SOX2 (magenta), HA (green). Scale bar, 100  $\mu\text{m}$ . (h) Representative Immunostaining images of *FOXP1<sup>S/S</sup>* hESCs derived hCOs on day 42 for NKX2-1 (green). Scale bar, 200  $\mu\text{m}$ . (i) Western blot of *FOXP1<sup>S/S</sup>* hESCs derived hCOs on day 42 to detect ventral forebrain maker NKX2-1, showed decreasing of NKX2-1 protein level, as shutting off FOXP1 protein production.

Fig. 2g

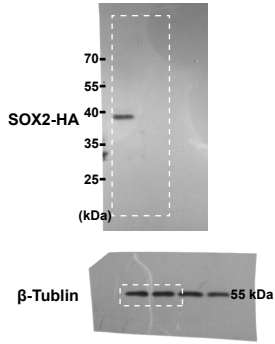

Fig. 2h

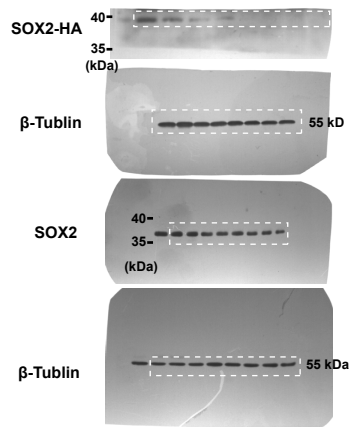

Fig. 2k

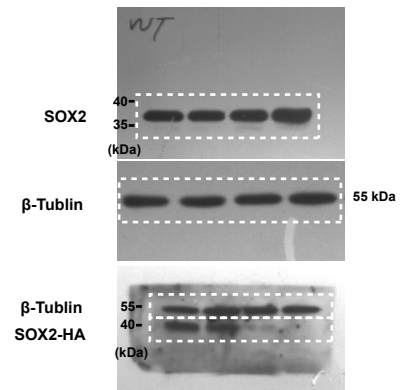

Fig. 3e

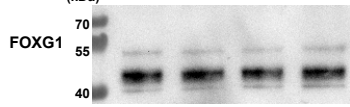

Fig. 3f

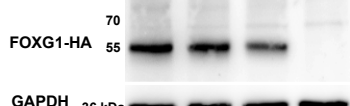

Fig. 3g

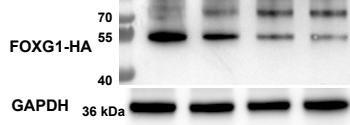

Fig. 3h

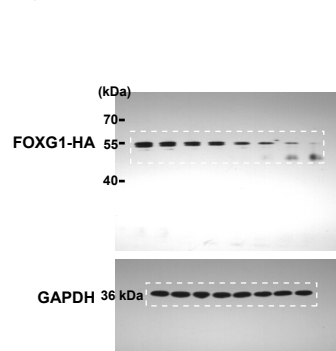

Fig. 4d

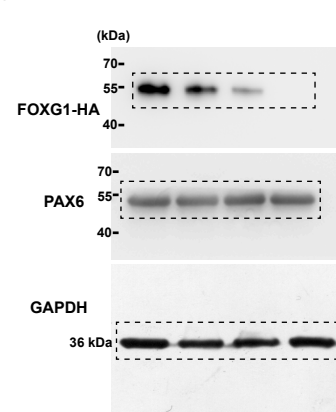

Fig. 4i

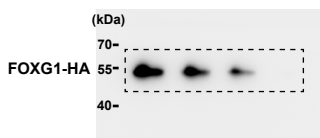

Fig. 4j

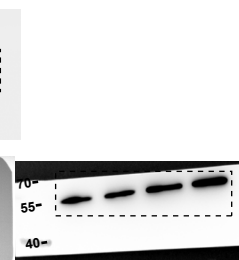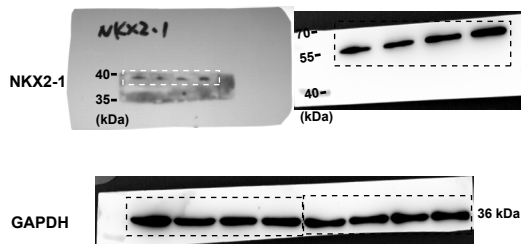

Fig. 8d

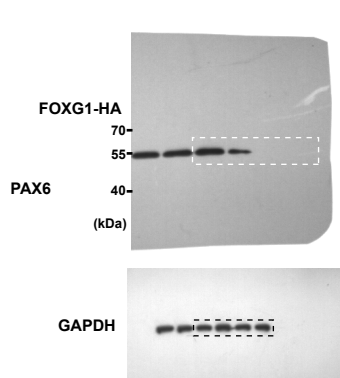

Fig. 8e

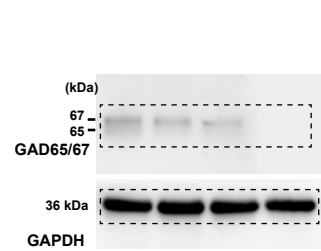

Supplementary Figure 10. Uncropped images of western blots in main figures.



Supplemental Figure 3b

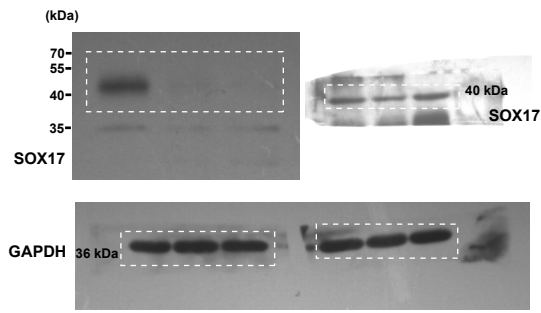

Supplemental Figure 3d

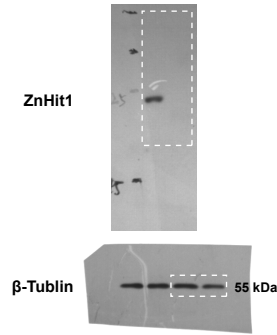

Supplemental Figure 3f

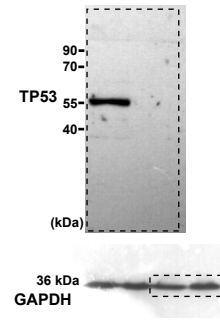

Supplemental Figure 3j

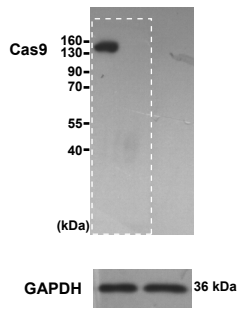

Supplemental Figure 5a

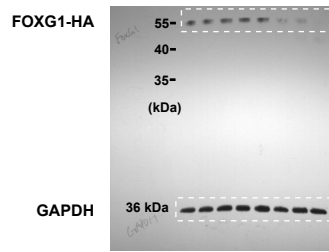

Supplemental Figure 9i

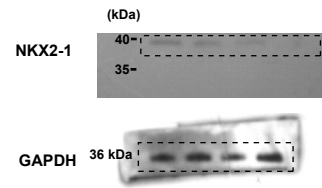

Supplementary Figure 11. Uncropped images of western blots in supplemental figures.

Fig. 1c, e

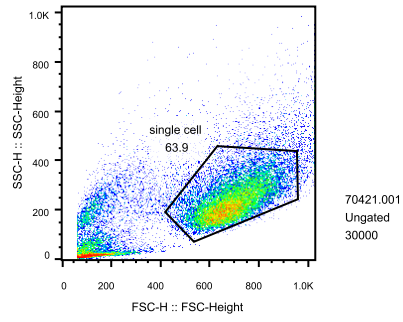

Fig. 1i

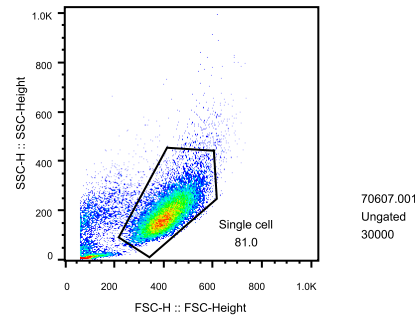

Supplemental Figure 1e

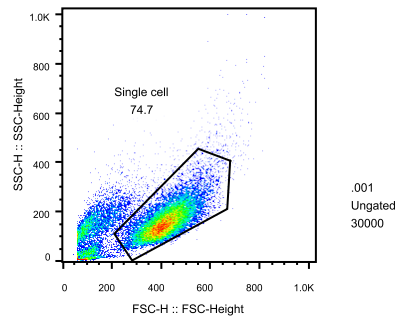

Supplemental Figure 3h

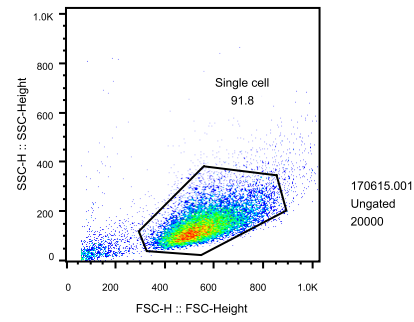

Fig. 4e

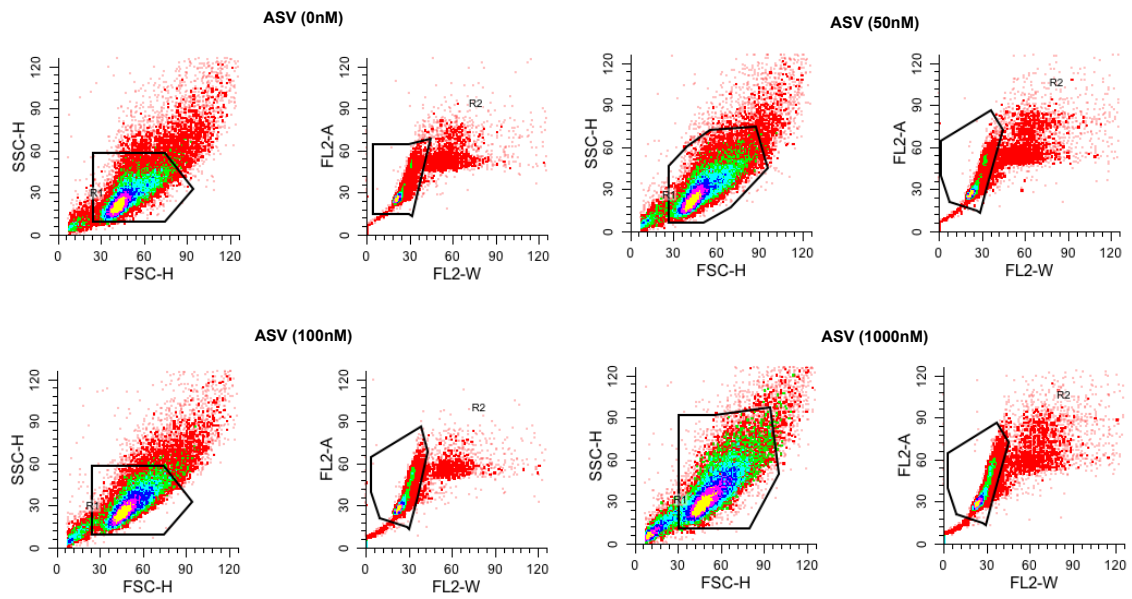

Supplementary Figure 12. All FACS sequential gating strategies in figures.

## Supplementary Table 1

### Primers for Off-target Analysis

|               |                             |               |                              |
|---------------|-----------------------------|---------------|------------------------------|
| B2M-OT1-F:    | TTTCCTGAAGCTTTTCCTCG        | B2M-OT1-R:    | CTAAAATGGCAATGCTGATGCCTG     |
| B2M-OT2-F:    | CCTCAGTTTCCCATATGAACATG     | B2M-OT2-R:    | AGCTGCTTGTGGATTGTGCATGG      |
| B2M-OT3-F:    | CTGATATGTTGATTGCTGGTGAG     | B2M-OT3-R:    | TCCGGGGATGCAAGGACCATTG       |
| ZnHit1-OT4-F: | AGGTGTGCTGATGCTCTGTCAGG     | ZnHit1-OT4-R: | GACAACAGTGACCTGGTGATGCTG     |
| ZnHit1-OT5-F: | ATAGCCACACCGGGCTGTGCTCC     | ZnHit1-OT5-R: | ATGAAGAGTGAGTTAGTTTCGACAG    |
| SOX17-OT1-F:  | TTCTCCACTGAATAACCCACAGG     | SOX17-OT1-R:  | AGAGCAGGAGCCTCAGGTGAG        |
| SOX17-OT2-F:  | TAAACATAGAGCATGCCCTCAAAG    | SOX17-OT2-R:  | AATGAAATCTTTCTAGGAAGCCCG     |
| SOX17-OT3-F:  | AATAGTACACATGTACTTTCCTGTTG  | SOX17-OT3-R:  | ACAATTCAAAGATCTCTACTAATTG    |
| SOX17-OT4-F:  | CCAAAATAATACGGAAACTTTGACAAG | SOX17-OT4-R:  | GCAGATTATCTCCCATGACCTG       |
| SOX17-OT5-F:  | GATTGTCTTATCTTCTAGAGAACTG   | SOX17-OT5-R:  | GACCAAATAATACGGAAACTTTGACAAG |
| TP53-OT1-F:   | CTTGATGTCTCTGTCTCTTTTG      | TP53-OT1-R:   | AATTCTGAGCCTCCCTCTGCTGG      |
| TP53-OT2-F:   | CTAACAAAATTGTAGCTGACCTCCA   | TP53-OT2-R:   | TTGTTGTTGGCAGCACCAAGCAG      |
| TP53-OT3-F:   | ATTCTCCAGGAGAAACATCAGAG     | TP53-OT3-R:   | CTGAGGGAGCTCCAGCTCCAG        |
| TP53-OT4-F:   | GGCGTCCGAATGACCTCAG         | TP53-OT4-R:   | CACGCTTCGGACGTGTGGAG         |
| TP53-OT5-F:   | TGGGAGCTGGAGGTGCAATAAG      | TP53-OT5-R:   | AGAGAGATGGCTTAAGTGGTCTG      |
| FOXG1-OT1-F:  | CATCTACATTGGTATCAAATATCAGG  | FOXG1-OT1-R:  | TGAGTCCTATCTAGGTCTATATAAG    |
| FOXG1-OT2-F:  | CTACTCTGTTGTGATTCTGCTGG     | FOXG1-OT2-R:  | ATCACAATTCAAGTTACATCAGGG     |
| FOXG1-OT3-F:  | CCAGGTGGAGAATATTTGTATGG     | FOXG1-OT3-R:  | GAAACACAGATCACTTCTGTGG       |
| FOXG1-OT4-F:  | TAAATGGTTAATGAGACATGCC      | FOXG1-OT4-R:  | TCTGCATGTAGTACTCAGAAAGG      |
| FOXG1-OT5-F:  | CTGGTCTTTAAAGCTCCATCCTG     | FOXG1-OT5-R:  | ACAAATACCTGCGTGATTCCCAG      |
| SOX2-OT1-F:   | ACCTCCGGGACCTGATCAGCACG     | SOX2-OT1-R:   | TCCATGCTGTTTCTACTCTCCTC      |
| SOX2-OT2-F:   | GGAGCAATCACAGCTTTCTACTTCC   | SOX2-OT2-R:   | TAAATGTATTTATCATTAAGGC       |
| SOX2-OT3-F:   | GCTCGATACATTGGCATGGTATAG    | SOX2-OT3-R:   | TTCAGCGTTTAAAGCACATCCTCTG    |
| SOX2-OT4-F:   | GCTGCAACCACTCTTGGCATTCC     | SOX2-OT4-R:   | AGAGTAACTGTCCAACGGGCATG      |
| SOX2-OT5-F:   | TCTTGGGTGTTCCCTTAACCTTGG    | SOX2-OT5-R:   | TCACCTGATTGACGACAAAGGTGG     |

## Supplementary Table 2

### Primers for Genotyping of SMASh Tagged hESC Colonies.

|               |                             |               |                           |
|---------------|-----------------------------|---------------|---------------------------|
| B2M-seq-F:    | TTTCCTGAATTGCTATGTGTCTGGG   | B2M-seq-R:    | TCTGTTCCCTTTATCTCCTCTAGTG |
| FOXG1-seq-F:  | CAAGTACGAGAAGCCGCCGTTTCAG   | FOXG1-seq-R:  | CACAACACAAACTGAAGGCAATCG  |
| SOX2-seq-F:   | AGCGCCCGCATGTACAACATGATG    | SOX2-seq-R:   | GCAACTGTCCTAAATTCAGCTGCAG |
| SOX17-seq-F:  | AGAAGCGGCCCTTCGTGGAGGAG     | SOX17-seq-R:  | CCTTCTACTTAAAGTGATATACTGG |
| TP53-seq-F:   | GAATCCTATAACCACATTCTTGCCCTC | TP53-seq-R:   | TCTACCTAACCAGCTGCCCAACTG  |
| ZnHit1-seq-F: | TCTGCAGAACTTGAGTGTGGCCGAG   | ZnHit1-seq-R: | GAAACTTCTGGGTTTTCCGTA CTG |
| AAVS1-seq-F:  | TCGACCTACTCTTCCGCATTGG      | AAVS1-seq-R:  | CGCACCGTGGGCTTGTA CTGG    |
| SMASh-seq-R:  | GGAGCCCTTATCATCGTCGTCCTTG   |               |                           |

### Supplementary Table 3

#### Primers for qRT-PCR.

|                       |                         |                       |                          |
|-----------------------|-------------------------|-----------------------|--------------------------|
| RT-LHX9-F:            | GGGAGTGGACATCGTCAATTA   | RT-LHX9-R:            | GTCTTCTGCGAGGGTGGATA     |
| RT-HES1-F:            | CGGACATTCTGGAAATGACA    | RT-HES1-R:            | TACTTCCCCAGCACACTTGG     |
| RT-PAX6-F:            | TCCGTTGGAACTGATGGAGT    | RT-PAX6-R:            | GTTGGTATCCGGGGACTTC      |
| RT-NKX2-1-F:          | TGAACGTAAGATGGAGGAACA   | RT-NKX2-1-R:          | GCCAAGGTCAGCCTTATTGA     |
| RT-DLX2-F:            | AGCAGCTATGACCTGGGCTA    | RT-DLX2-R:            | AATTTCAAGGCTCAAGGTCTC    |
| RT-ASCL1-F:           | CTAAAGATGCAGGTTGTGC     | RT-ASCL1-R:           | GGAGCTTCTCGACTTCACCA     |
| RT-SIX6-F:            | CTGTGACAGGACCTGCTGC     | RT-SIX6-R:            | CAACCGGACTGACCCCTAC      |
| RT-OLIG2-F:           | GATAGTCGTCGCAGCTTTCG    | RT-OLIG2-R:           | CCTGAGGCTTTTCGGAGC       |
| RT-SST-F:             | TGGGTTTCAGACAGCAGCTC    | RT-SST-R:             | CCCAGACTCCGTCAGTTTCT     |
| RT-GAD1-F:            | GCGGACCCCAATACCACTAAC   | RT-GAD1-R:            | CACAAGGCGACTCTTCTCTTC    |
| RT-PDGFR $\alpha$ -F: | TTGAAGGCAGGCACATTTACA   | RT-PDGFR $\alpha$ -R: | GCGACAAGGTATAATGGCAGAAT  |
| RT-MYT1-F:            | GAAGGAGCCCCGTCAAGTC     | RT-MYT1-R:            | AGAAGTTGCGATGATTCCCTG    |
| RT-SOX10-F:           | CCTCACAGATCGCCTACACC    | RT-SOX10-R:           | CATATAGGAGAAGGCCGAGTAGA  |
| RT-NPY2R-F:           | CATCTTGCTTGGGGTAATTGGC  | RT-NPY2R-R:           | AGAGTGAACGGTAGACACAGAG   |
| RT-RAX-F:             | AAGCCCCTCGACCCACTG      | RT-RAX-R:             | CCGCCGATGCTTTTTCTTGG     |
| RT-OTP-F:             | GCACAGCTCAACGAGTTGGA    | RT-OTP-R:             | GTCAGCCCATACGCAGTG       |
| RT-PMCH-F:            | TTTCAAAGAACACAGGCTCCAAA | RT-PMCH-R:            | GCATACATCTGAGCATGTCAAATC |
| RT-GAPDH-F:           | CGGATTTGGTCGTATTGGG     | RT-GAPDH-R:           | CGCTCCTGGAAGATGGTGAT     |
